# Supplementary material for: Stable isotope (δ&lt;sup&gt;18&lt;/sup&gt;O, δ&lt;sup&gt;2&lt;/sup&gt;H) signature of river runoff, groundwater and precipitation in three river basins in the center of East European Plain
Source: Copernicus journal article supplement (doi:10.5194/essd-2022-145), 2022-08-01
Supplement: Supplementary file [file essd-2022-145-AC1-supplement.pdf]

*Comments to “Stable isotope ( $\delta^{18}O$ ,  $\delta^2H$ ) signature of river runoff, groundwater and precipitation in three river basins in the center of East European Plain” by Chizhova et al., The authors collected samples for isotopic analysis in three basins with collecting areas varying from 17 km<sup>2</sup> to 16300 km<sup>2</sup> in eastern Europe. The samples and data are valuable to the isotope community, and the study falls into the scope of the journal.*

*Major concerns:*

*a) The descriptions of the importance of the data needs to be strengthened, e.g., readers will not know how many datasets were collected and analyzed in the study from the ‘Abstract’ section; also, the scarcity, including the high sampling frequency and completeness, of the data should be described more clearly.*

*We have made some correction to ‘Abstract’ and ‘Introduction’ sections to show the importance, relevance and completeness of our data.*

*b) The writing should be checked by native English speakers, and the grammatic errors could be found throughout the manuscript.*

*The manuscript was read and corrected by native English speaker.*

*Monir concerns:*

*Line 18: ‘3’ should be replaced by ‘three’ here. Line 19: ‘during October 2019’*

*Corrected*

*Line 21: ‘in’ there three basins*

*Corrected*

*Line 22: ‘fundamentally’ should be deleted*

*Corrected*

*Line 28: ‘Recent climate change...’; ‘and an important ....’*

*Corrected*

*Line 29: are effective tools for ....*

*Corrected*

*Line 31: surface – atmosphere water ‘exchanges’ and ...*

*Corrected*

*Lines 32-34: These references should be divided into several sections according to which description they supported. Line 40: i.e. quantitatively establish...*

*Corrected*

*Lines 48-49: Full names should be shown for 'GNIR' and 'GNIP' when they appeared for the first time. Above minor concerns are only examples, and the entire manuscript should be carefully checked*

Corrected

We are very grateful to the Reviewer for comments and suggestions.
